# Supplementary material
Source: PubMed Central journal article supplement (PMC5165202)
Supplement: JVI.01613-16_zjv999182230s1.pdf [file JVI.01613-16_zjv999182230s1.pdf]

1 **Supplementary Information S1** BaseSpace Correlation Engine. This Microsoft Excel file  
2 contains five spreadsheets; Combined, Canonical Pathways, Gene Ontology, Protein Families  
3 and Regulatory Motifs. Within each of the Canonical Pathways, Gene Ontology, Protein  
4 Families and Regulatory Motifs spreadsheets are the data generated by the BaseSpace  
5 Correlation Engine analyses of differentially expressed genes at 36hpi with pOka, gB[Y881F],  
6 gB[Y920F] and gB[Y881/920F] or the genes associated with the wild type-like or hyperfusogen  
7 phenotypes. The combined spreadsheet compiles all of the analyses into a single table.
